# Supplementary material
Source: PubMed Central journal article supplement (PMC5555162)
Supplement: NIHMS867330-supplement-Supplement_1.pdf [file NIHMS867330-supplement-Supplement_1.pdf]

# Supplemental Figure 1

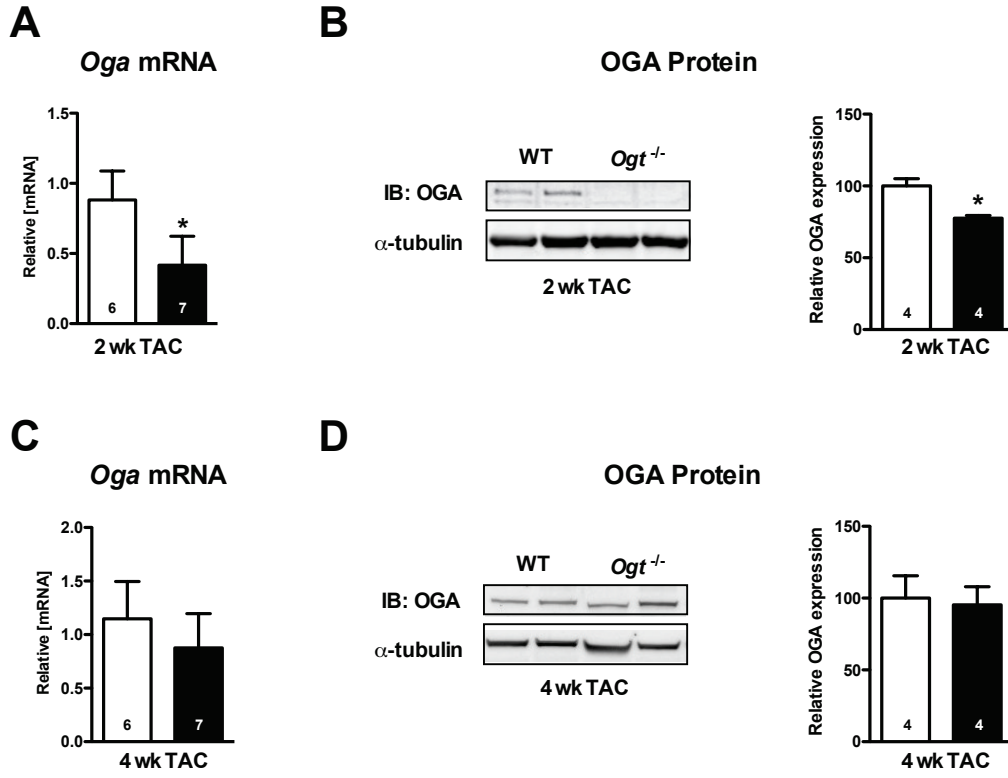

## Supplemental Figure 2

**A**

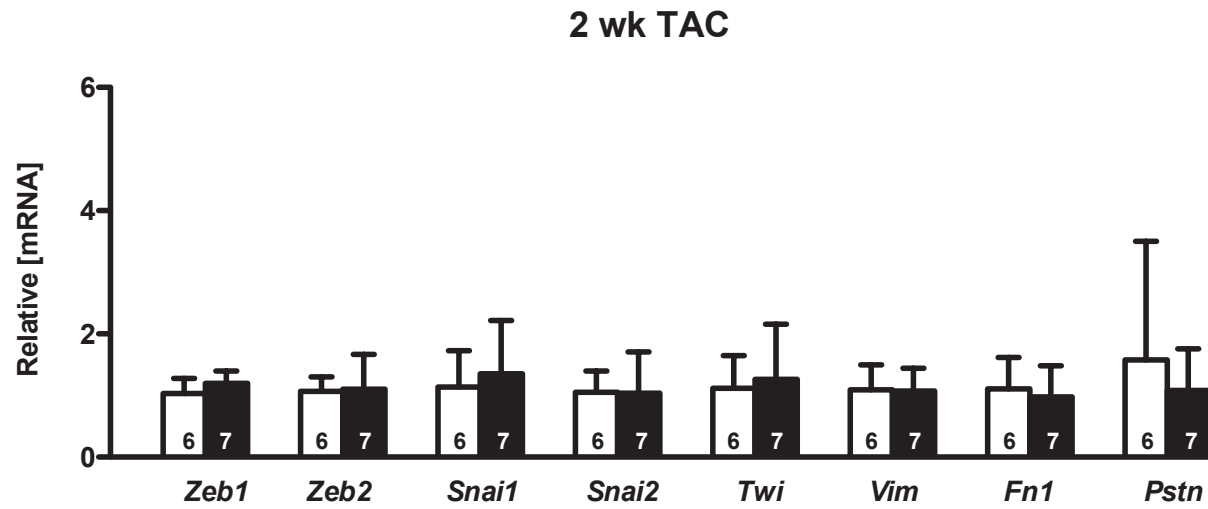

**B**

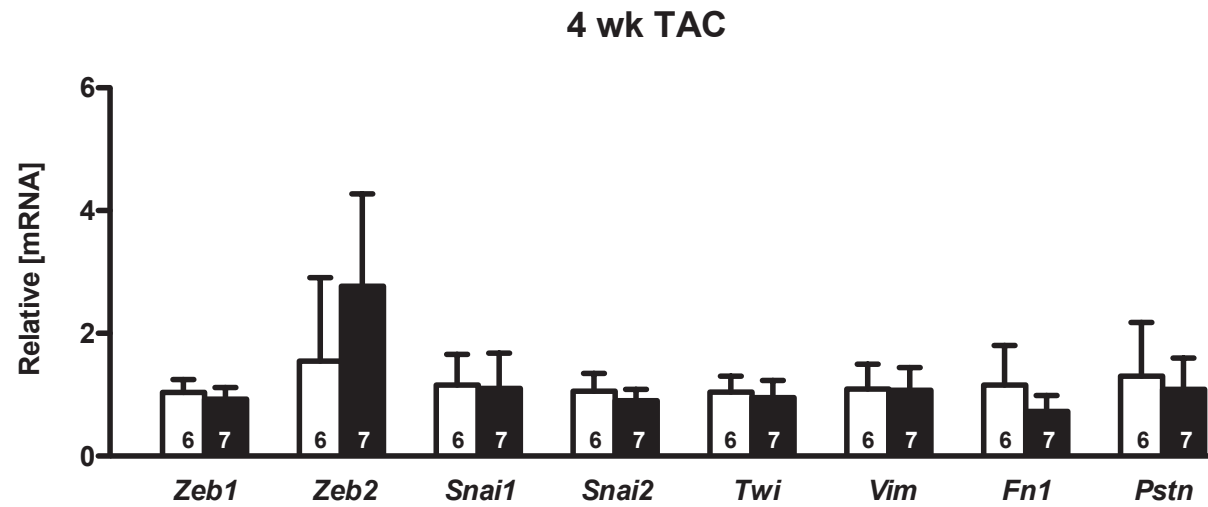

# Supplemental Figure 3

## A

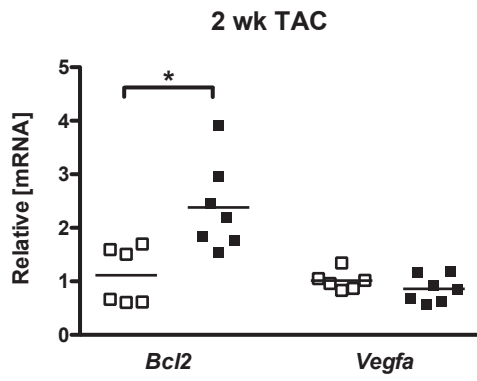

## B

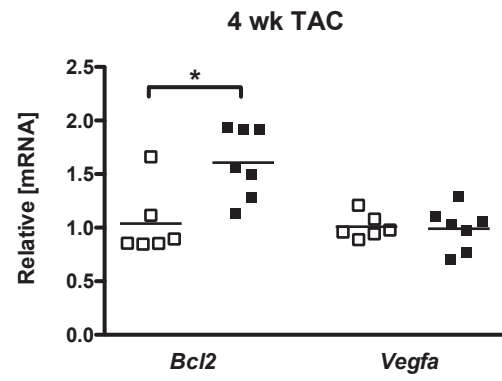

## C

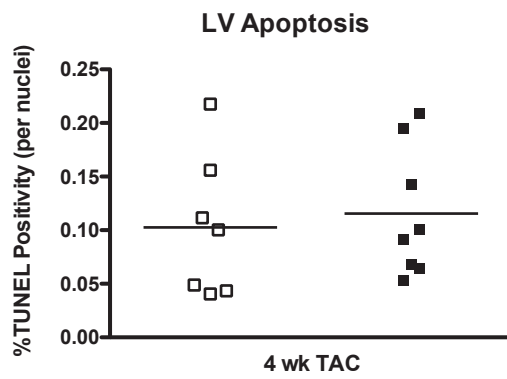

## D

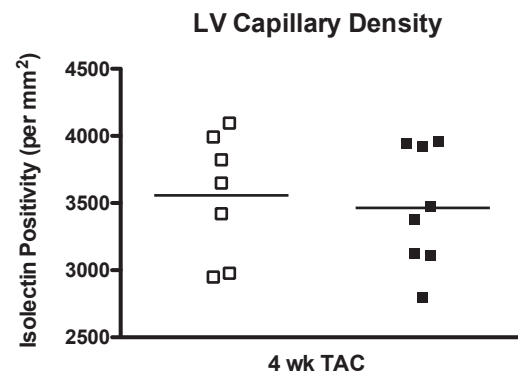

□ WT TAC

■ *i-cmOgt*<sup>-/-</sup> TAC
